# Supplementary material
Source: PubMed Central journal article supplement (PMC4933288)
Supplement: NIHMS796416-supplement-SuppF1.pdf [file NIHMS796416-supplement-SuppF1.pdf]

**Supplemental Figure 1. PCoA plots of Unweighted and Weighted UniFrac Distances.**

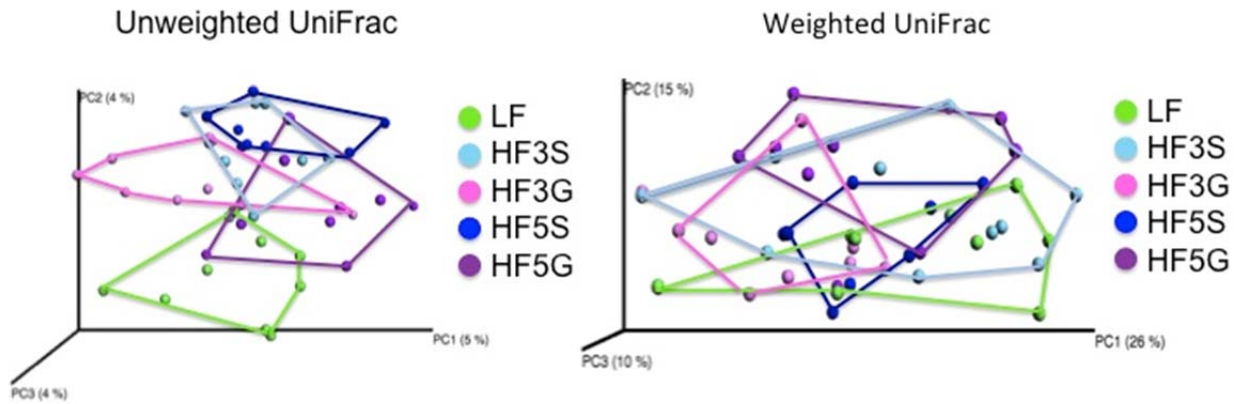

**Supplemental Figure 1.** PCoA plots of unweighted and Weighted UniFrac distances. LF, low fat; 3S, high fat diet containing 3% sugar; 3G high fat diet containing 3% grapes; 5S, high fat diet containing 5% sugar; 5G, high fat diet containing 5% grapes.

## Supplemental Table 1. Diet Formulation

| Table 1. Formula for low fat (LF) and high fat (HF) diets with or without grape powder (G) |       |      |      |      |      |      |      |      |      |      |  |
|--------------------------------------------------------------------------------------------|-------|------|------|------|------|------|------|------|------|------|--|
| Product #                                                                                  | LF    |      | HFG3 |      | HFS3 |      | HFG5 |      | HFS5 |      |  |
| Ingredient                                                                                 | gm    | kcal | gm   | kcal | gm   | kcal | gm   | kcal | gm   | kcal |  |
| Casein                                                                                     | 200   | 800  | 200  | 800  | 200  | 800  | 200  | 800  | 200  | 800  |  |
| L-Cystine                                                                                  | 3     | 12   | 3    | 12   | 3    | 12   | 3    | 12   | 3    | 12   |  |
| Corn Starch                                                                                | 506.2 | 2025 | 194  | 776  | 194  | 776  | 194  | 776  | 194  | 776  |  |
| Maltodextrin 10                                                                            | 125   | 500  | 94   | 376  | 94   | 376  | 94   | 376  | 94   | 376  |  |
| Fructose                                                                                   | 0     | 0    | 0    | 0    | 13.3 | 53   | 0    | 0    | 21.9 | 88   |  |
| Dextrose, anhydrous                                                                        | 0     | 0    | 0    | 0    | 13.3 | 53   | 0    | 0    | 21.9 | 88   |  |
| Sucrose                                                                                    | 68.8  | 275  | 154  | 616  | 154  | 616  | 139  | 556  | 139  | 556  |  |
| Cellulose, BW200                                                                           | 50    | 0    | 50   | 0    | 50   | 0    | 50   | 0    | 50   | 0    |  |
| Soybean Oil                                                                                | 25    | 225  | 12   | 108  | 12   | 108  | 12   | 108  | 12   | 108  |  |
| Butter                                                                                     | 0     | 0    | 144  | 1296 | 144  | 1296 | 144  | 1296 | 144  | 1296 |  |
| Lard                                                                                       | 20    | 180  | 0    | 0    | 0    | 0    | 0    | 0    | 0    | 0    |  |
| Mineral Mix, S10026                                                                        | 10    | 0    | 10   | 0    | 10   | 0    | 10   | 0    | 10   | 0    |  |
| DiCalcium Phosphate                                                                        | 13    | 0    | 13   | 0    | 13   | 0    | 13   | 0    | 13   | 0    |  |
| Calcium Carbonate                                                                          | 5.5   | 0    | 5.5  | 0    | 5.5  | 0    | 5.5  | 0    | 5.5  | 0    |  |
| Potassium Citrate, 1 H2O                                                                   | 16.5  | 0    | 16.5 | 0    | 16.5 | 0    | 16.5 | 0    | 16.5 | 0    |  |
| Vitamin Mix, V10001                                                                        | 10    | 40   | 10   | 40   | 10   | 40   | 10   | 40   | 10   | 40   |  |
| Choline Bitartrate                                                                         | 2     | 0    | 2    | 0    | 2    | 0    | 2    | 0    | 2    | 0    |  |
| Grape powder                                                                               | 0     | 0    | 28.5 | 103  | 0    | 0    | 47   | 169  | 0    | 0    |  |
| FD&C Yellow Dye #5                                                                         | 0.025 | 0    | 0.03 | 0    | 0    | 0    | 0.05 | 0    | 0    | 0    |  |
| FD&C Red Dye #40                                                                           | 0.025 | 0    | 0    | 0    | 0.03 | 0    | 0    | 0    | 0.05 | 0    |  |
| FD&C Blue Dye #1                                                                           | 0     | 0    | 0.03 | 0    | 0.03 | 0    | 0    | 0    | 0    | 0    |  |
| Total                                                                                      | 1055  | 4057 | 937  | 4127 | 935  | 4130 | 940  | 4133 | 937  | 4140 |  |
| total fat, kcal%                                                                           |       | 10.0 |      | 33.3 |      | 33.4 |      | 33.3 |      | 33.3 |  |
| sat. fat, kcal%                                                                            |       | 2.3  |      | 20.3 |      | 20.3 |      | 20.3 |      | 20.3 |  |
| monounsatur. fat, kcal%                                                                    |       | 3.0  |      | 10.1 |      | 10.2 |      | 10.1 |      | 10.1 |  |
| polyunsatur. fat, kcal%                                                                    |       | 4.7  |      | 2.9  |      | 2.9  |      | 2.9  |      | 2.9  |  |
| trans fat, kcal%                                                                           |       | 0.0  |      | 1.1  |      | 1.1  |      | 1.1  |      | 1.1  |  |
| added sugars, kcal%                                                                        |       | 8.0  |      | 16.6 |      | 16.6 |      | 16.6 |      | 16.6 |  |

LF, low fat; 3S, high fat diet containing 3% sugar; 3G high fat diet containing 3% grapes; 5S, high fat diet containing 5% sugar; 5G, high fat diet containing 5% grapes.
